# Supplementary material
Source: PubMed Central journal article supplement (PMC3590092)
Supplement: supp_2011.059071_2011_059071-Contributions.pdf [file supp_2011.059071_2011_059071-Contributions.pdf]

**Manuscript no. HAEMATOL/2011/059071 entitled “Effects of switching from a reduced dose imiglucerase to velaglucerase in type 1 Gaucher disease: clinical and biochemical outcomes”**

**Authors: Laura van Dussen, Timothy M. Cox, Erik J. Hendriks, Elizabeth Morris, Erik M. Akkerman, Mario Maas, Johanna E.M. Groener, Johannes M.F.G. Aerts, Patrick B. Deegan and Carla E.M. Hollak**

**Information about the contributions of each person named as having participated in the study**

**1) Guarantor(s)**, i.e., person(s) who is (are) responsible for the integrity of the work as a whole:

- Laura van Dussen, Academic Medical Centre Amsterdam, department of Endocrinology and Metabolism, l.vandussen@amc.uva.nl
- Carla Hollak, Academic Medical Centre Amsterdam, department of Endocrinology and Metabolism, c.e.hollak@amc.uva.nl

According to the International Committee of Medical Journal Editors (ICMJE)

([http://www.icmje.org/ethical\\_1author.html](http://www.icmje.org/ethical_1author.html)): “*Authorship credit should be based on: 1) substantial contributions to conception and design, acquisition of data, or analysis and interpretation of data; 2) drafting the article or revising it critically for important intellectual content; and 3) final approval of the version to be published. Authors should meet conditions 1, 2, and 3 ..... Acquisition of funding, collection of data, or general supervision of the research group alone does not constitute authorship*”.

**The guarantors of this manuscript confirm that all persons designated as authors qualify for authorship, and that each author has participated sufficiently in the work to take public responsibility for appropriate portions of the content.**

**2) Authors who participated in the conception of the study:** Laura van Dussen, Timothy M. Cox, Patrick B. Deegan, Carla E.M. Hollak

**3) Design & Methods.** The following authors were responsible for specific investigations (please detail):

- Laura van Dussen, Elizabeth Morris, Timothy Cox, Patrick Deegan and Carla Hollak were responsible for the acquisition of data (general)
- Erik Hendriks, Johanna Groener and Johannes Aerts were responsible for the chitotriosidase activity data (Dutch patients)
- Erik Akkerman was responsible for the QCSI data
- Mario Maas was responsible for the imaging data

**4) Results.** The following authors were responsible for specific portions of the results, including figures and tables (please indicate the person responsible for each figure and each table):

- Laura van Dussen and Carla Hollak were responsible for figure 1 and table 1
- Laura van Dussen (general), Timothy Cox (general), Mario Maas (imaging), Johanna Groener (chitotriosidase activity), Johannes Aerts (general, part. chitotriosidase activity), Patrick Deegan (general) and Carla Hollak (general) contributed to the analysis and interpretation of data

**5) Writing the manuscript.** The following authors were responsible for writing the manuscript:

- Laura van Dussen drafted the manuscript
- All authors revised the manuscript critically for important intellectual content and approved the final version

**6) Contributors Listed in Acknowledgments:** Not Applicable
